# Supplementary material for: Development of a plant carbon-nitrogen interface coupling framework in a coupled biophysical-ecosystem-biogeochemical model (SSiB5/Triffid/DayCent-SOM v1.0): Its parameterization, implementation, and evaluation
Source: Copernicus journal article supplement (doi:10.5194/egusphere-2023-2634), 2023-11-13
Supplement: Supplementary file [file egusphere-2023-2634-AC1-supplement.pdf]

## Response to Anonymous Referee #1

### General comments:

This study addresses the critical need to improve the representation of nitrogen cycle in land biogeochemical processes which is a crucial aspect of modelling development. The manuscript presents a novel approach by integrating a soil organic matter and nutrient cycling model to advance simulating coupled global carbon-nitrogen cycles in a process-based dynamic vegetation model. The authors demonstrate that the coupled model version shows in general improvement of GPP, LAI, and heat fluxes validated against site-level and global observations, compared to the previous model version. It is certainly a timely work with supporting analysis, although only partially reflecting the performance of the revised model. There are several concerns that the authors should address to enhance the manuscript.

Reply: Thank you very much for your comprehensive and constructive reviews. We appreciate your effort and acknowledge your review in the paper's "Acknowledgment".

### Main concerns:

1. The framework implemented in the study revolves around processes in terrestrial N cycles, more specifically about plant N demand and stress. However, the relevant processes are overly simplified when describing the necessity to modify current representations in the models.

Reply: Thank you for the comments and suggestions. In Main Concern 5, the reviewer also complains of a related issue: "The manuscript contains erroneous, redundant, or repetitive expressions throughout. Especially in the method section, there is a substantial amount of text either already addressed in the introduction or better suited for the discussion". Since these two issues both contribute to the presentation problem of model parametrization, we address these issues together.

To more comprehensively describe the necessity of modifying the current relevant parameterizations, we have added more relevant information to Section 2.2.1-2.2.5. Moreover, because our discussions on the methodology in the previous version spread across several places in the paper, which causes repetition and redundancy but is not comprehensive in either place, we reorganize the introduction and Section 2.2.1-2.2.5 to arrange the discussion on these processes more concentrating on relevant sections.

In this way, we hope that the description for each process is much clearer and more comprehensive and eliminates some redundancies and repetitions.

In the revised introduction, we mainly emphasize the necessity of including proper N processes in the Earth System Model (ESM) in general and move more detailed discussions on relevant processes (parameterizations) to the related sections 2.2.1-2.2.3. Moreover, we have attempted to improve the accuracy of the description of the development history of N process modeling and reduce the number of citations of relevant papers, as suggested by the review.

The following are a few examples in our revisions.

In the introduction, we revised the N-process model development as follows:

***New Lines 54-69:** “Adequate C-N coupling in plant N processes has been indicated as an area that still needs intensive investigation (Thum et al., 2019; Ghimire et al., 2016; Goll et al., 2017; Yu et al., 2020; Zaehle et al., 2015; Zhu et al., 2019). The fundamental aspects of N cycling for terrestrial biosphere models, such as N limitation of vegetation growth, strategies in which vegetation invests C to increase the N supply under N-limited conditions, and N limitation of decomposition, have been identified as important challenges for representing N cycling in terrestrial biosphere models (Meyerholt et al., 2020; Peng et al., 2020; Zaehle et al., 2015). Some key plant N processes, such as N limitation on GPP, the effect of biomass N content on autotrophic respiration, plant N uptake, ecosystem N loss, and biological N fixation, have been introduced into LSMs with various complexities to determine the effects of N limitation in current land models. These methods include, for instance, using N to scale down the photosynthesis parameter  $V(c, max)$  (Ghimire et al., 2016; Zaehle et al., 2015) or potential GPP to reflect N availability (Gerber et al., 2010; Oleson et al., 2013; Wang et al., 2010), defining the C cost of N uptake (Fisher et al., 2010) and optimizing N allocation for leaf processes (Ali et al., 2015). The wide variety of assumptions and formulations of N cycling processes and C-N coupling reflects knowledge gaps and divergent theories, and further investigation is imperative (Kou-Giesbrecht, S., et al. 2023). The coupling of N processes is still an area of model development. In the latest Coupled Model Intercomparison Project Phase 6 (CMIP6, Eyring et al., 2016), although there were 112 different coupled models with various land surface models from 33 research teams, only about 10 models incorporated an N cycle module (Arora et al., 2020).”*

In Section 2.2.2 “Dynamic C/N ratio”, some relevant information in the Introduction has been moved to this section. We first briefly describe the C/N ratio in the natural

world and the current status of C/N ratio modeling with proper citations. We then added more information for our modeling.

In Section 2.2.3 “Effects of N limitation on photosynthesis”, we also moved the discussion of the parameterization of this issue from the Introduction to this section and made many revisions to improve our description of our model.

In Section 2.2.4 “Improvement of nitrogen impact on respiration rates”, we added more information to support our approach and how our parameterization was obtained.

In Section 2.2.5 “N limitation on LAI based on plant phenology”, we added more information on why this is an important issue, which was largely missing in the previous version.

We hope that with these major revisions, the issues that concern the reviewer will be properly addressed.

2. Although it is important to evaluate the impacts on C and heat fluxes, more information on how the dynamic representation of the C/N ratios alter the N cycles would be very pertinent and interesting to report, provided the model outputs include relevant variables to describe the processes. Otherwise, there would remain a **logic gap** to make sense of the differences in C and heat variables between the new and old model versions.

Reply: We understand the reviewer’s idea that it is interesting to compare the fixed C/N ratio and dynamic C/N ratio effects. In fact, this was also our original consideration. However, it is difficult to design such comparisons. Our parameterizations of the effects of N limitation on three processes (photosynthesis, phenology, and respiration) (Section 2.2.3-2.2.5) are based on the dynamic C/N ratio. For a fixed C/N ratio, some of these have to be changed. As such, it is difficult to just specify a fixed C/N ratio but with other parameterizations still being associated with a dynamic C/N ratio. Simply specifying a fixed C/N ratio may mislead readers.

In the revised paper, at the beginning of Section 2.2.2, we present many studies demonstrating that the dynamic C/N ratio is a phenomenon that exists in real biogeochemical processes, which we hope can provide a background and justification for the dynamic C/N ratio approach.

3. The need to evaluate plant C processes under the modified N processes is well motivated in the introduction. However, the connection between N processes and heat fluxes is absent.

Reply: The reviewer raises a very important issue. As an NSF Climate Dynamics Program-supported project, how the N process influences the water and energy cycle is an important subject. In fact, we have presented the latent heat flux and sensible heat flux with/without N limitation in Table 6 and Figures 6 and 7. For the 13-site average, the results with N limitation showed only slight improvement.

This is because there are three components in our model that contribute to the total latent heat flux (as shown in Fig. 7 and Table 6). They include transpiration from the canopy, direct evaporation from the leaf due to interception loss of precipitation, and soil evaporation. In the offline test, the atmospheric demand is fixed; when transpiration is reduced/increased due to the change in photosynthesis process (caused by the N limitation), soil evaporation must change to satisfy the atmospheric demand. This change is not linear because the sensible heat flux also changes. As such, with fixed demand and radiative forcing from the atmosphere, it is difficult to properly assess the effect on heat flux. At the end of this paper, we added the following lines:

*New line 633-636. “Finally, this is an offline experiment in which the atmospheric forcing (such as downward radiation) is fixed. With a fixed atmospheric demand, the heat flux response due to the N limitation effect is also limited, as shown in section 4.1. A comprehensive assessment of the effect of N limitation on heat fluxes and atmospheric circulation needs to be conducted in a fully coupled atmosphere–land model.”*

4. The introduction made a leap from “C-only models and dynamic vegetation models generally miss the inclusion of N processes” to “this new framework not only consider N processes but also has a more realistic way to represent the processes with dynamic C/N ratios”. Often dynamic vegetations include N cycles since decades, see e.g., Kou-Giesbrecht, S., et al. (2023) 10.5194/esd-14-767-2023. The current state of modelling C-N cycles is therefore misrepresented and the progress in other models is under recognized, although cited Davies-Barnard et al 2020 the authors themselves.

Reply: Thank you for pointing this out. We have revised this part of the introduction. Please see our response to Main Concerns #1.

5. The manuscript contains erroneous, redundant, or repetitive expressions throughout. Especially in the method section, there is a substantial amount of text either already addressed in the introduction or better suited for the discussion.

Reply: We apologize for these writing issues. We have revised and reorganized the paper, especially the introduction and methodology sections (2.2.1-2.2.5), to make the statement accurate and avoid redundancies. Please see our response to Main concern #1 for more information.

**Minor points:**

1. Suggest revising the title to make it more concise.

Reply: Done. We have revised this title to “*Development of a plant carbon-nitrogen interface coupling framework in a coupled biophysical-ecosystem-biogeochemical model (SSiB5/Triffid/DayCent-SOM v1.0)*” and eliminated “*Its parameterization, implementation, and evaluation*”.

2. The manuscript may benefit from additional analysis relating to the improved representation on N limitation for different PFTs.

Reply: We agree with the reviewer that it is a very good idea to include the analysis relating to the improved representation of N limitation for different PFTs. In fact, this information was included in our original manuscript. However, based on the editor’s instructions for this paper’s resubmission, the current paper is mainly focused on describing model development. The discussion on the scientific issues in the previous submission has been removed per the editor’s suggestion.

3. The use of “wood” or “stems/wood” as a plant organ can be misleading. In Table 1 they are then listed as “component” where it is also false to list “wood” under grasses. Please be consistent with the common terms and stick with stem.

Reply: Done. We now use “stem” throughout the paper.

4. Suggest adding some information on tundra shrub as it is not covered in the validation sites (Table 3).

Reply: Thank you for the suggestion. Our validation sites were limited to the AmeriFlux sites. We now include a tundra site (Lund *et al.*, 2012) for validation. The figure attached below is also included in the revised Section 4.1. The results are consistent with those at other sites and are shown in the revised Table 6 (previously Table 5).

**Table R1.** Tundra site information used for model validation.

| Site name        | LAT   | LONG   | PFT    | Time      |
|------------------|-------|--------|--------|-----------|
| Zackenberg Heath | 74.47 | -20.55 | tundra | 2000-2014 |

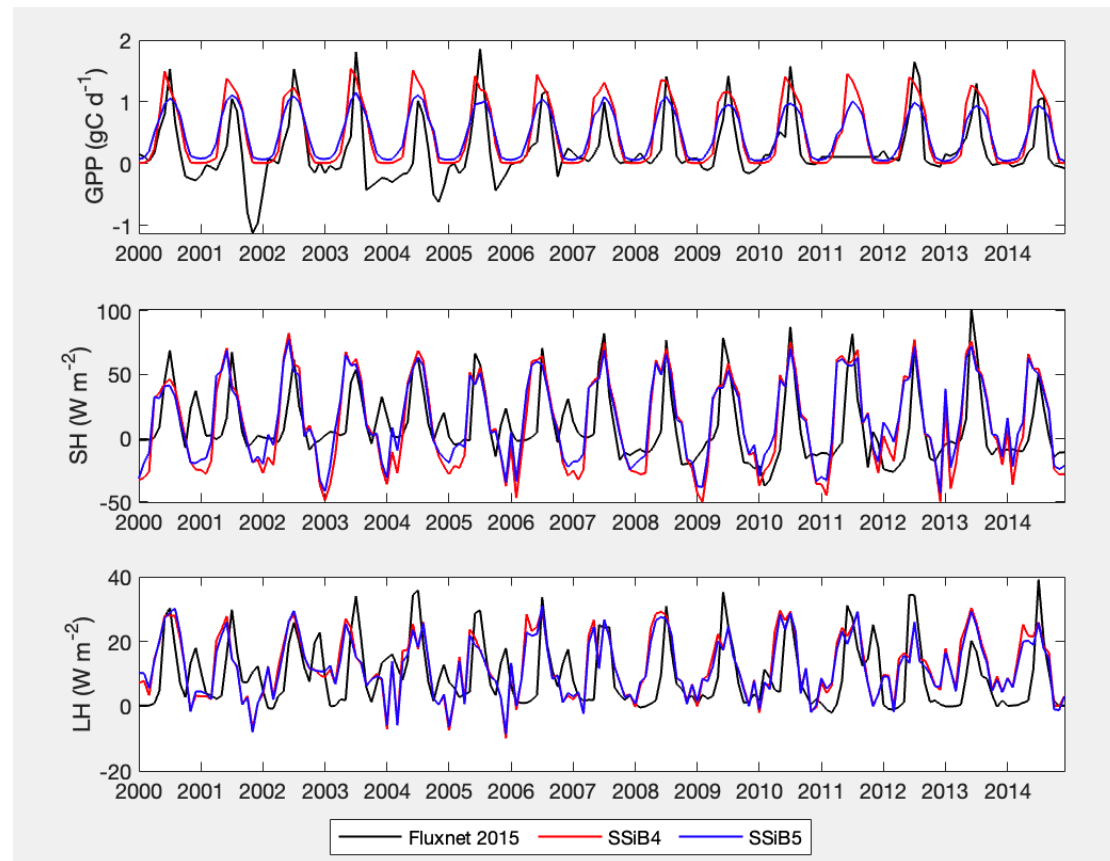

**Figure R1.** Simulated seasonal variations in GPP, sensible heat, and latent heat against observations at the tundra site.

### References:

Lund, M., Falk, J. M., Friborg, T., Mbufong, H. N., Sigsgaard, C., Soegaard, H. and Tamstorf, M. P.: Trends in CO<sub>2</sub> exchange in a high Arctic tundra heath, 2000–2010, *J. Geophys. Res.*, 117(G2), G02001, 2012.

5. The figure qualities are not consistent.

Reply: To improve the figure quality, we utilized MATLAB to redraw all the figures, employed the same image resolution parameters for the output, and used the PNG format instead of the PDF format for storage.

6. When dealing with a variable having the unit of per area (e.g., Navail, g N m<sup>-2</sup>), the soil depth is essential information, however not clearly indicated in the manuscript.

Reply: Thank you for your careful review. We have added this information to the revised text as follows:

**New Lines 227-228:** “The DayCent-SOM only provides the total available nitrogen ( $N_{avail}$ ) for the plant within one grid box (the soil is 3.2 m in depth), which consists of several PFTs.”

7. The authors are strongly suggested to select references carefully instead of piling them up excessively, such as with the 17 citations in L54 to 57 and 12 citations in L40.

Reply: We apologize for this. We have selected references more carefully and deleted some as suggested, as shown in the example below.

**New Lines 50-53:** “As such, the N cycle and its effect on C uptake in the terrestrial biosphere have been incorporated into land surface models (LSMs) of ESMS (Davies-Barnard et al., 2020; Kou-Giesbrecht et al, 2023) with various representations of N processes (Ali et al., 2015; Asaadi et al., 2021; ~~Best et al., 2011~~; Clark et al., 2011; Davies-Barnard et al., 2020; Ghimire et al., 2016; Goll et al., 2017; ~~Krinner et al., 2005~~; Lawrence et al., 2019; ~~Matson et al., 2002~~; Oleson et al., 2013; Smith et al., 2014; Thum et al., 2019; ~~Wang et al., 2010~~; Wiltshire et al., 2020; ~~Yu et al., 2020~~; ~~Zhu et al., 2019~~.)”

**New Lines 35-39:** “To study these processes, the land surface components of Earth System Models (ESMs) have evolved from those that represent only physical processes (i.e., hydrology and the energy cycle) to those that include the terrestrial carbon cycle, vegetation dynamics, and nutrient processes (Cox, 2001; Dan et al., 2020; Foley et al., 1998; ~~Jiang et al., 2014~~; ~~Niu et al., 2020~~; Oleson et al., 2013; ~~Pan et al., 2017~~; Sellers et al., 1996; Sitch et al., 2003; Wang et al., 2010; Zhan et al., 2003 ). ”

8. Please clarify several terms in the paragraph of L70-87, including “plant resistance on photosynthesis ...” (as in it does not make sense to call it resistance on photosynthesis but more like resistance on the reduction of photosynthesis capacity or potential photosynthesis rate, not to be confused with photosynthesis rate, under N limitation), “C/N interactions” (as in if it is about the C to N ratio and something else, or the interactions between some C processes and N processes), “self-adjustment” (as in how such behaviors differ from being simply considered as “responses”), and “fertility” (as in if it refers to soil fertility or plant fertility which is not a well-known term).

Reply: Thank you for your careful review. In the revised paper,

“Plant resistance on photosynthesis” has been replaced with more proper words/presentations.

“C/N interaction” has been revised to “C and N process interaction”.

“Self-adjustment” is replaced by “response”, “adaptation”, or eliminated.

“Fertility” was changed to “plant fertility”.

**Line-specific comments:**

1. L38, suggest changing to only “physical processes” instead of “biophysical processes” as the commonly simplified land representation in ESMs does not include biological processes as the authors listed themselves.

Reply: Done.

*New Line 36: “To study these processes, the land surface components of Earth System Models (ESMs) have evolved from those that represent **only physical** processes (i.e., hydrology and the energy cycle) to those that include the terrestrial carbon (C) cycle, vegetation dynamics, and nutrient processes (Cox, 2001; Dan et al., 2020; Foley et al., 1998; Oleson et al., 2013; Sellers et al., 1986; Sitch et al., 2003; Wang et al., 2010). ”*

2. L47, suggest changing “Those C-only models” to “The C-only models” as in not all those models mentioned prior, i.e., land process models and dynamic vegetation models, are C-only.

Reply: Done.

*New Line 45: “**The** C-only models ignore significant nitrogen (N) impacts and therefore overestimate C sequestration by terrestrial ecosystems under climate change (Peñuelas et al., 2013; Zaehle et al., 2015).”*

3. L72 “dynamic plant C/N ratio” is not necessarily a concept. According to the authors, it should be a more realistic representation than fix ratios.

Reply: Done.



**New Line 73:** *“The dynamic plant CNR is a more realistic representation than the fixed plant CNR in assessing the effect of N limitation on plant C processes and interactions between plant C and N processes.”*

4. L73-74, please revise these two sentences. Suggest removing “Due to their relative immobility”. Suggest changing “A deficiency of any type of nutrient” to “Nutrient deficiency”.

Reply: The sentence has been revised and moved to Section 2.2.2.

**New Line 174** *“Nutrient deficiency may result in decreased plant productivity and/or plant fertility (McDowell et al., 2008; Morgan and Connolly, 2013; Stenberg and Muola, 2017).”*

5. L75-77, suggest changing “have to” to “can” and keeping fewer citations. The usage of self-adjustment is misleading in such context.

Reply: Done. The sentence has been revised and moved to Section 2.2.2 as follows:

**New Line 175:** *“Evidence has shown that plant CNR **can** change with nutrient availability (Chen and Chen, 2021; McGroddy et al., 2004; Meyer-Grünefeldt et al., 2015; Sardans et al., 2012; Smith, 1991;) ”*

6. L77-79, please revise this sentence. Lipid is not a polymer. It should be “nutrient-starved”. Unclear if the authors mean C/N ratios are influenced by being exposed to high light or the accumulation of C polymer are greater when exposed to high light. Please revise the term “high light”.

Reply: The sentence has been revised and moved to Section 2.2.2 as follows:

**New Line 176:** *“Plant cell CNRs are influenced by the accumulation of C polymers, such as carbohydrates, and are greater when cells are nutrient starved or exposed to high levels of photosynthetically active radiation (PAR) (Aber et al., 2003; MacDonald et al., 2002; Talmy et al., 2014). ”*

7. L82, suggest clarifying what the N is, such as soil N availability or plant N, and whether it is photosynthesis capacity or actual photosynthesis rate.

Reply: This sentence has been deleted in the revised version because it is redundant with other parts of the paper.

8. L96-99, please add references for the flux data and satellite-derived observational data.

Reply: Done.

*New Lines 86-91: “The coupled model is verified at thirteen flux tower sites (Lund et al., 2012; Pastorello et al., 2020) with different PFTs and is used to conduct several sets of global 2-D offline simulations from 1948 to 2007 to assess the effects of the coupling process. Model predictions of global GPP and LAI have been evaluated against satellite-derived observational data (Jung et al., 2009, Sheffield et al., 2006, Zhu et al., 2013). The results demonstrate the relative importance of different plant N processes in this C-N framework.”*

9. L116, please clarify what “vegetation conditions” are. It should be “physiological”.

Reply: The sentence has been revised to make it more specific.

*New Lines 106-107: “Moreover, the surface albedo and aerodynamic resistances are also updated based on the vegetation leaf area index, vegetation cover, vegetation height, and greenness.”*

10. L119, suggest changing to “C4 grasses” to be precise and consistent with Tables 2 and 3. It is “tundra shrub” in Tables 1 and 2. Please clarify what is “net C availability”.

Reply: Done. We have revised Tables 1 and 2 to maintain consistency. The term “Net C availability” was replaced with “NPP”.

11. L125, consider listing the pools in a table to present the information more clearly.

Reply: We listed the nitrogen pools as suggested (also as new Table 1 in the paper).

**Table R2.** The Nitrogen Pools in DayCent-SOM

|                                          | Aboveground                                 | Belowground                                                            |
|------------------------------------------|---------------------------------------------|------------------------------------------------------------------------|
| <b>Mineral N pool</b>                    |                                             | Soil mineral N pools                                                   |
| non-woody litter pools                   | Surface structural N<br>Surface metabolic N | Soil structural N<br>Soil metabolic N                                  |
| <b>Organic N pool</b>                    |                                             |                                                                        |
| woody debris pool                        | Surface dead N                              |                                                                        |
| kinetically defined organic matter pools | Surface active N<br>Surface slow organic N  | Soil active organic N<br>Soil slow organic N<br>Soil passive organic N |

12. L134, please either clarify the temperature and moisture effects or remove the word “effects”.

Reply: These words have been removed. The sentence has been revised as follows:

*New Line 125: “Each type of organic pool has its own intrinsic rate of decomposition, modified by temperature and moisture-effects (Parton et al., 1994).”*

13. L140, please revise “plant life activities”.

Reply: The term “plant life activity” was vague and has been deleted throughout the paper.

*New Line 140: “To represent C and N interactions, we have developed a plant C-N interface framework to couple biophysical and biochemical processes in the carbon and nitrogen cycles-in plant life activities.”*

14. L141, L144, please refrain from using “/” excessively. Suggest changing “physical/biological” to “physical and biological” and “temperature/moisture” to “temperature and moisture”. Please check for other “/” as well.

Reply: Done. Thank you for pointing this out. We eliminated many instances of “/” in the paper.

15. L145, please revise this sentence and clarify “surface water”, “carbon fluxes” (it is not mentioned in the second half of the sentence), and “plant litter” (e.g., as in fluxes for production and decomposition or pools).

Reply: Done. These sentences have been revised as follows:

*New Lines 144-146: “The soil N dynamics model (DayCent-SOM) is directly driven by soil temperature, soil moisture, net radiation and plant C and N litter inputs into the soil organic pool, which are provided by the SSiB5/TRIFFID. ~~Because the surface water, radiation, and carbon fluxes and plant litter are calculated by SSiB5, we force DayCent-SOM with SSiB5-produced soil temperature, soil moisture, and SSiB5/TRIFFID-produced plant~~*

16. L148-150, please revise this sentence. It is unclear what the authors mean by “N effects on plant physiology from photosynthesis, ... plus a dynamic C/N ratio”.

Reply: The sentence has been revised as follows:

*New Lines 148-150: “Following plant N uptake from DayCent-SOM, our plant C-N interface framework describes the effects of N on photosynthesis, plant autotrophic respiration, and plant phenology (Fig. 1). All these effects are associated with a dynamic CNR.”*

17. L152-154, please revise this sentence. It reads repetitive with “not only considers N limitation ... but also emphasizes the N limitation effect ...” and “help us obtain more information to understand ...”

Reply: The sentence has been revised as follows:

*New Lines 169-171 “With consideration of the effect on phenology, the N limitation effect during the growth season is emphasized. All these considerations in the framework should help to understand the effects of N processes to the C cycle more comprehensively.”*

18. L163-164, please revise the sentence to clarify the potential confusion that GPP follows autotrophic respiration. Please revise “in plant life”.

Reply: These sentences have similar meanings to those of other sentences and have been deleted from the revised paper.

19. L166, this might be controversial as in plants can certainly respond and adapt to lower N availability but it would be a stretch to certainly call it “adjust resource

Reply: *New Line 180*. We changed “adjusting resources” to “respond and adapt to lower N availability”.

20. L167-170, please revise this sentence. It reads contradicting with “resorb only 50%” and “cause a major internal nutrient flux”.

Reply: “A major internal nutrient flux” has been eliminated. The sentences have been revised to

*New Lines 181-184. “Studies show that plants resorb only about 50% of leaf N on average (Aerts, 1996) to conserve nutrients (Clarkson and Hanson, 1980) and to increase nutrient use efficiency (Herbert & Fownes, 1999; Vitousek, 1982). These processes cause changes in the CNR to reduce the impact of N limitation (Talhelm et al., 2011; Vicca et al., 2012).”*

21. L170-172, please revise this sentence to improve clarity and avoid going in circle, such as what affect plant productivity and litter N content. Now it reads like “plant responses affect plant productivity and litter N content”.

Reply: This sentence has been deleted. This sentence tries to point out the fixed C/N ratio’s shortcoming. However, actually, it did not provide real substance.

22. L173-174, please revise this sentence to clarify “improve plant responses”.

Reply: This sentence has been eliminated from the revised paper to avoid repetition.

23. L179-196, the majority of this paragraph should fit in the introduction or discussion better.

Reply: This paragraph has been moved to Section 2.2.3 to provide background information for our parameterization of the N limitation effect on photosynthesis.

24. L197, please revise this sentence to increase clarity. For instance, NPP is part of the terrestrial C cycle.

Reply: *New Line 162*: The sentence was revised to “*Nitrogen is not the only dominant regulator of photosynthesis and vegetation dynamics*”.

25. L199, please clarify “normal N concentration”.

Reply: In *the new Line 164*, we changed it to “In common N concentration range”.

26. L203, please revise the sentence “Because plants need time to turnover, the plant N processes ...” for clarity and accuracy.

Reply: To reduce the number of repetitions, this and some other sentences have been removed.

27. L205, perhaps the authors mean “modulates LAI evolution, e.g., via leaf mortality?” Should it be “supplies” instead of “supplements?”

Reply: To reduce the number of repetitions, this and some other sentences have been removed.

28. L209, since C/N ratios is abbreviated as CNRs from here, why not introducing it from the start?

Reply: This is a good suggestion. We now apply the CNR from the start.

29. Regrettably, similar issues persist throughout the rest of the text. I will refrain from detailing them further until the authors have thoroughly revised the manuscript.

Reply: Please see our response to the major concern. The paper has reorganized to address this issue.

Overall, the general structure, clarity, terminology, as well as accuracy throughout the manuscript need to be substantially improved.
